# Supplementary material for: Implementing patient-centred outcome measures in palliative care clinical practice. An updated systematic review of facilitators and barriers
Source: Research Square preprint supplement (doi:10.21203/rs.3.rs-7358185/v1), 2025-10-01
Supplement: Supplementary file 4 [file bf6125095c69828a8785ec35.docx]

Appendix 6: Models of implementation extracted from included studies

| **Study Name** | **Frameworks/Models/Theories** |
| --- | --- |
| Hughes et al. 200470 | **Action research** provides practitioners with a framework for affecting change at the same time as research is used to understand organisational responses to change. |
| Kane et al. 201879 | Discussion: The **Innovative Care for Chronic Conditions (ICCC)** framework emphasises the need for patients to be informed, active participants in their own healthcare. |
| Potts et al. 2018107 | **Donabedian model** that offers an outline for evaluating health service systems and the quality of health care. It includes three interconnected domains—structure (human, material, and organizational resources), process (delivery and reception of the health services), and outcome (results or effect the services have on patients). MODELs: Home-Based Model; Community-Managed Model; Integrated With Hospital Model; Integrated With Hospice Model; Integrated With HIV Clinic Model; Patient/Caregiver Self-Management Model |
| Spaner et al. 2017127 | **Plan-Do-Study-Act (PDSA)** |
| Sawatzky et al. 2018115 | **Knowledge to Action (KTA)** and **Integrated Knowledge Translation (iKT)** |
| Schick-Makaroff et al. 2020116 | Knowledge to Action (KTA) |
| Pinto et al. 201813 | **Consolidated Framework for Implementation Research (CFIR)** |
| Bradshaw et al. 2021b34 | **Implementation Science Frameworks** (How, why, and in what circumstances) and Implementation Strategies  **Theory**: Normalisation Process Theory |
| Howell et al. 202069 | **Knowledge to Action (KTA); Integrated Knowledge Translation (iKT)**  **Theory**: Principles of Change Management |
| Kane et al. 201778 | **Medical Research Council’s (MRC) Framework** for the development and evaluation of **complex interventions**; The **Bugge et al’s Analytical Framework** |
| Bookbinder et al. 199631 | **FOCUS-PDCA** Program Development (A detailed description of **Continuous Quality Improvement (CQI) Framework**); PMP Model of Structure, Education, and Problem Solving |
| Kilonzo et al. 201581 | Enhanced Palliative Care Day Care Model in already established social and therapeutic model |
| Krawczyk et al. 2019b84 | **Micro-Meso-Macro Analytical Framework** (Micro-Meso-Macro Practice Tensions) |
| Smith et al. 2017125 | Nurse Champion Model |
| van den Hurk et al. 2022135 | eHealth Enhanced Chronic Care Model |
| Voorend et al. 2021137 | Models of conducting nephrology-tailored routine geriatric assessment: by a geriatric-trained and experienced nephrologist/nurse practitioner, or by partnership between geriatric medicine and nephrology |
| Wu et al. 2022138 | Radiation Therapist-Led Champion Model |
| Hall et al. 202062 | **Nonadoption, Abandonment, Scale-up, Spread and Sustainability (NASSS) Framework**. This framework suggests that sustaining implementation may be very difficult in contexts in which health conditions are unpredictable, where the intervention does not directly measure changes in health condition, and where the intervention does not readily align with prevailing organisation and system beliefs, including what counts as ‘high-quality’ evidence. |
| Patel et al. 2022104 | **Plan-Do-Study-Act (PDSA)** |
| Lee et al. 201675 | **Plan-Do-Study-Act (PDSA)** in QI Project |
| Muir et al. 201897 | **Plan-Do-Study-Act (PDSA)** |
| Pezold et al. 2019106 | **Plan-Do-Study-Act (PDSA)**: Plan: The use of IPOS and barriers to its use, development of education; Do: educational training sessions for HCP; Study: Any HCP visits occurred after education, audit came from a random selection of visits from each HCP in 90 days of education; Act: Audits of provider visits for documentation of interventions, results will be shared with funders. HCP will receive further education as needed based on the audit results. |
| Rauenzahn et al. 2017109 | **Plan-Do-Study-Act (PDSA)**; Model for Improvement |
| Diffin et al. 201843 | **Promoting Action on Research Implementation in Health Services (PARIHS) Framework**: PARIHS identifies three key components of the implementation process: evidence, context, and facilitation. Implementation is more likely to occur when evidence is scientifically robust, aligns with practitioner and patient beliefs and local experience (high evidence), the context is receptive to change (high context), and there is appropriate input from internal and external facilitators (high facilitation). Successful implementation is defined as a function of the complex interplay between evidence, context, and facilitation.  **Diffusion of Innovation Theory** highlights the importance of “triability”: Innovations which users can more easily try out tend to be adopted more easily. It proposes that individuals within an organization learn within the social context of other learners. People are “not passive recipients of innovations” but rather they seek to evaluate them and communicate about them. |
| Lind 201888 | **Promoting Action on Research Implementation in Health Services (PARIHS); Consolidated Framework for Implementation Research (CFIR)**; Process evaluation of complex interventions by Moore et al. |
